# Supplementary material for: Trends of Multidrug-Resistant Pathogens, Difficult to Treat Bloodstream Infections, and Antimicrobial Consumption at a Tertiary Care Center in Lebanon from 2015–2020: COVID-19 Aftermath
Source: MDPI journal article supplement (doi:10.3390/antibiotics10081016), 2021-08-21
Supplement: s1 [file s1]

Supplementary Table S1. All isolated species from 2015-2020 by increasing frequency

| Organism                                           | Number of Isolates | 2015 | 2016 | 2017 | 2018 | 2019 | 2020 |
|----------------------------------------------------|--------------------|------|------|------|------|------|------|
| <i>Escherichia coli</i>                            | 4239               | 817  | 767  | 722  | 673  | 770  | 490  |
| <i>Staphylococcus epidermidis</i>                  | 1613               | 267  | 312  | 240  | 273  | 292  | 229  |
| <i>Klebsiella pneumoniae</i> ss. <i>pneumoniae</i> | 1265               | 208  | 208  | 206  | 236  | 241  | 166  |
| <i>Pseudomonas aeruginosa</i>                      | 1083               | 237  | 189  | 177  | 185  | 179  | 116  |
| <i>Staphylococcus</i> , coagulase negative         | 679                | 130  | 99   | 88   | 113  | 141  | 108  |
| <i>Staphylococcus aureus</i> ss. <i>aureus</i>     | 625                | 127  | 94   | 93   | 125  | 120  | 66   |
| <i>Enterococcus faecium</i>                        | 580                | 129  | 106  | 102  | 107  | 84   | 52   |
| <i>Acinetobacter baumannii</i>                     | 522                | 199  | 115  | 73   | 58   | 48   | 29   |
| <i>Proteus mirabilis</i>                           | 472                | 91   | 73   | 74   | 104  | 73   | 57   |
| <i>Enterococcus faecalis</i>                       | 419                | 47   | 51   | 66   | 51   | 137  | 67   |
| <i>Enterobacter</i> sp.                            | 408                | 128  | 80   | 100  | 68   | 25   | 7    |
| <i>Stenotrophomonas maltophilia</i>                | 282                | 79   | 54   | 37   | 48   | 34   | 30   |
| <i>Morganella morganii</i> ss. <i>morganii</i>     | 260                | 63   | 51   | 57   | 47   | 25   | 17   |
| <i>Pseudomonas</i> sp.                             | 133                | 44   | 27   | 22   | 13   | 17   | 10   |
| <i>Klebsiella oxytoca</i>                          | 115                | 23   | 25   | 19   | 20   | 21   | 7    |
| <i>Enterobacter cloacae</i>                        | 114                | 3    | 2    |      | 19   | 47   | 43   |
| <i>Citrobacter freundii</i>                        | 105                | 23   | 21   | 18   | 21   | 13   | 9    |
| <i>Salmonella</i> sp.                              | 100                | 22   | 15   | 18   | 23   | 14   | 8    |
| <i>Streptococcus viridans</i> , alpha-hem.         | 100                | 13   | 22   | 25   | 24   | 12   | 4    |
| <i>Corynebacterium</i> sp.                         | 84                 | 23   | 12   | 10   | 24   | 14   | 1    |
| <i>Serratia</i> sp.                                | 84                 | 22   | 20   | 15   | 15   | 8    | 4    |

|                                           |    |    |    |    |    |    |    |
|-------------------------------------------|----|----|----|----|----|----|----|
| Streptococcus pneumoniae                  | 70 | 25 | 16 | 7  | 12 | 6  | 4  |
| Citrobacter koseri (diversus)             | 68 | 9  | 11 | 9  | 15 | 13 | 11 |
| Haemophilus influenzae                    | 68 | 10 | 12 | 20 | 4  | 17 | 5  |
| Proteus vulgaris                          | 52 | 19 | 11 | 11 | 5  | 3  | 3  |
| Streptococcus, beta-haem. Group B         | 47 | 15 | 11 | 4  | 12 | 3  | 2  |
| Serratia marcescens                       | 43 | 3  | 4  | 2  | 3  | 12 | 19 |
| Klebsiella aerogenes                      | 42 |    | 1  |    | 14 | 14 | 13 |
| Acinetobacter lwoffii                     | 37 | 13 | 10 | 8  | 2  | 1  | 3  |
| Streptococcus mitis                       | 35 |    | 4  | 2  | 11 | 12 | 6  |
| Streptococcus, beta-haem. Group A         | 35 | 8  | 7  | 6  | 11 | 3  |    |
| Aerococcus viridans                       | 20 | 10 | 8  | 1  | 1  |    |    |
| Salmonella Typhi                          | 17 | 5  | 6  | 1  | 2  | 2  | 1  |
| Burkholderia cepacia                      | 15 | 8  | 1  |    | 5  | 1  |    |
| Raoultella terrigena                      | 15 | 4  |    | 5  | 6  |    |    |
| Non-fermenting Gram negative rods         | 14 | 11 | 1  |    | 1  | 1  |    |
| Streptococcus agalactiae                  | 12 |    |    |    | 2  | 2  | 8  |
| Streptococcus sp.                         | 11 |    |    |    | 3  | 4  | 4  |
| Campylobacter sp.                         | 10 | 1  | 3  | 1  | 2  | 3  |    |
| Acinetobacter junii                       | 8  | 1  | 2  | 2  | 2  |    | 1  |
| Streptococcus, beta-haem. Group G         | 8  | 2  | 2  | 1  | 1  | 2  |    |
| Moraxella (Branh.) catarrhalis            | 7  | 5  |    | 1  | 1  |    |    |
| Klebsiella sp.                            | 5  |    | 1  | 1  | 1  |    | 2  |
| Streptococcus, Group D (non-enterococcal) | 5  | 1  | 1  |    | 3  |    |    |
| Aeromonas hydrophila                      | 4  | 1  | 1  | 1  |    | 1  |    |
| Brucella sp.                              | 4  |    | 1  | 1  | 2  |    |    |
| Streptococcus bovis                       | 4  |    |    |    |    | 3  | 1  |

|                                                |   |   |   |   |   |
|------------------------------------------------|---|---|---|---|---|
| Streptococcus salivarius                       | 4 |   |   | 2 | 2 |
| Acinetobacter haemolyticus                     | 3 |   |   |   | 3 |
| Enterococcus sp.                               | 3 |   |   |   | 3 |
| Escherichia sp.                                | 3 | 1 | 1 |   | 1 |
| Pseudomonas putida                             | 3 |   | 1 | 2 |   |
| Salmonella Paratyphi B                         | 3 | 1 | 2 |   |   |
| Streptococcus gallolyticus ss. gallolyticus    | 3 |   |   | 1 | 2 |
| Streptococcus oralis                           | 3 |   |   | 1 | 2 |
| Achromobacter sp.                              | 2 |   |   | 2 |   |
| Enterococcus gallinarum                        | 2 |   |   |   | 2 |
| Gram positive rods                             | 2 | 1 |   | 1 |   |
| Haemophilus parainfluenzae                     | 2 |   | 1 |   | 1 |
| Leuconostoc sp.                                | 2 | 1 |   | 1 |   |
| Providencia stuartii                           | 2 |   |   | 1 | 1 |
| Stenotrophomonas sp.                           | 2 |   | 1 | 1 |   |
| Streptococcus anginosus                        | 2 |   |   | 1 | 1 |
| Streptococcus bovis II                         | 2 | 1 |   | 1 |   |
| Streptococcus constellatus                     | 2 |   |   |   | 2 |
| Streptococcus pyogenes                         | 2 |   |   | 2 |   |
| Streptococcus, beta-haem. Group C              | 2 |   | 1 | 1 |   |
| Achromobacter xylosoxidans ss.<br>xylosoxidans | 1 |   |   | 1 |   |
| Aeromonas sp.                                  | 1 |   |   |   | 1 |
| Aeromonas veronii biovar sobria                | 1 |   |   |   | 1 |
| Citrobacter sp.                                | 1 |   |   | 1 |   |
| Corynebacterium sp. (diphtheroids)             | 1 |   |   | 1 |   |

|                                             |   |   |   |
|---------------------------------------------|---|---|---|
| Hafnia alvei                                | 1 | 1 |   |
| Pantoea agglomerans                         | 1 | 1 |   |
| Pasteurella sp.                             | 1 |   | 1 |
| Prevotella oralis                           | 1 |   | 1 |
| Proteus sp.                                 | 1 |   | 1 |
| Providencia rettgeri                        | 1 |   | 1 |
| Sphingomonas paucimobilis                   | 1 | 1 |   |
| Staphylococcus lugdunensis                  | 1 |   | 1 |
| Staphylococcus sp.                          | 1 | 1 |   |
| Streptococcus dysgalactiae ss. dysgalactiae | 1 |   | 1 |
| Streptococcus gordonii                      | 1 |   | 1 |
| Streptococcus milleri                       | 1 | 1 |   |
| Streptococcus, beta-haemolytic              | 1 | 1 |   |

Supplementary Table  
S1b: Total  
Isolates/1000PD , all  
sample types

| Organism                | 2015 | 2016 | 2017 | 2018 | 2019 | 2020 |
|-------------------------|------|------|------|------|------|------|
| Escherichia coli        | 9,9  | 9,3  | 9,1  | 8,3  | 10,4 | 9,3  |
| Klebsiella pneumoniae   | 2,5  | 2,5  | 2,6  | 2,9  | 3,2  | 3,2  |
| Pseudomonas aeruginosa  | 2,9  | 2,3  | 2,2  | 2,3  | 2,4  | 2,2  |
| Staphylococcus aureus   | 1,5  | 1,1  | 1,2  | 1,5  | 1,6  | 1,3  |
| Enterococcus faecium    | 1,6  | 1,3  | 1,3  | 1,3  | 1,1  | 1,0  |
| Acinetobacter baumannii | 2,4  | 1,4  | 0,9  | 0,7  | 0,6  | 0,6  |
